# Supplementary material
Source: PubMed Central journal article supplement (PMC7878626)
Supplement: 12195_2020_650_MOESM2_ESM.pdf [file 12195_2020_650_MOESM2_ESM.pdf]

## 1 Example 1 Equations: predator-prey model

All equations and parameters are included in the main body of the text for this two equation model. Additionally, we provide a directory for download that includes all Matlab scripts for running a fully automated version of *CaliPro* on this predator-prey model example. This includes model parameters, equations and execution. The webpage address where a reader can download the zipped directory is: <http://malthus.micro.med.umich.edu/CaliPro>

## 2 Example 2 Equations: ODE granuloma lesion model

As the second example, we apply *CaliPro* to a system of 16 ODEs that capture bacterial, T cell, macrophage and cytokine dynamics within a single granuloma lesion. Below, we have listed equations, variable names and a brief explanation of the dynamics of each equation. Parameter symbols generally adhere to the following guidelines:  $\alpha$  parameters are growth rates.  $k$  parameters are rate constants involving other variables.  $\mu$  parameters are death or decay rates.  $c$  parameters are half-saturation values.  $Sr$  parameters are recruitment rate values to represent recruitment of cells from other areas of the body, for example.  $\beta$  and  $f$  parameters are scaling constants.

Extracellular Bacteria concentrations within the granuloma are represented as  $B_E$  across time. Extracellular bacteria can grow ( $\alpha_{20}$ ), or can be released when infected macrophages ( $M_I$ ) undergo apoptosis from cytotoxic T cells ( $T_C$ ) or TNF ( $F_\alpha$ ). Activated macrophages ( $M_A$ ) or resting Macrophages ( $M_R$ ) can kill extracellular bacteria.

$$\begin{aligned} \frac{dB_E}{dt} = & \alpha_{20}B_E + k_{17}NM_I \left( \frac{B_I^2}{B_I^2 + N^2M_I^2} \right) + k_{14a}N_{fracc} \frac{B_I}{M_I} M_I \left( \frac{\left( \frac{T_C + w_3 T_1}{M_I} \right)}{\left( \frac{T_C + w_3 T_1}{M_I} \right) + c_4} \right) \\ & + k_{14b}N_{fraca} \frac{B_I}{M_I} M_I \left( \frac{F_\alpha}{F_\alpha + f_9 I_{10} + s_{4b}} \right) - k_2 \frac{N}{2} M_R \left( \frac{B_E}{B_E + c_9} \right) \\ & - k_{15}M_A B_E - k_{18}M_R B_E - \mu_{B_E} B_E + \mu_{M_I} N_{fracd} \frac{B_I}{M_I} M_I \end{aligned}$$

Intracellular Bacteria concentrations are represented as  $B_I$  across time.  $B_I$  happens in the model as resting macrophages ( $M_R$ ) engulf extracellular bacteria at a rate of  $k_2$ . Intracellular bacteria can die and can also become extracellular bacteria when infected macrophages undergo apoptosis.

$$\begin{aligned}
\frac{dB_I}{dt} = & \alpha_{19}B_I(NM_I - B_I) + k_2\frac{N}{2}M_R\left(\frac{B_E}{B_E + c_9}\right) - k_{17}NM_I\left(\frac{B_I^2}{B_I^2 + N^2M_I^2}\right) \\
& - k_{14a}\frac{B_I}{M_I}M_I\left(\frac{\left(\frac{T_C + w_3T_1}{M_I}\right)}{\left(\frac{T_C + w_3T_1}{M_I}\right) + c_4}\right) - k_{14b}\frac{B_I}{M_I}M_I\left(\frac{F_\alpha}{F_\alpha + f_9I_{10} + s_{4b}}\right) \\
& - k_{52}\frac{B_I}{M_I}M_I\left(\frac{\left(\frac{T_C\left(\frac{T_1}{T_1 + c_{T_1}}\right) + w_1T_1}{M_I}\right)}{\left(\frac{T_C\left(\frac{T_1}{T_1 + c_{T_1}}\right) + w_1T_1}{M_I}\right) + c_{52}}\right) \\
& - \mu_{B_I}B_I - \mu_{M_I}\frac{B_I}{M_I}M_I
\end{aligned}$$

Resting Macrophages ( $M_R$ ) are recruited to the granuloma according to the number of activated Macrophages ( $M_A$ ), the number of infected macrophages ( $M_I$ ) and the concentration of TNF ( $F_\alpha$ ) in the granuloma.  $M_R$  can become activated or infected macrophages, or die.

$$\begin{aligned}
\frac{dM_R}{dt} = & Sr_M + \alpha_{4a}(M_A + w_2M_I) + Sr_{4b}\left(\frac{F_\alpha}{F_\alpha + f_8I_{10} + s_{4b}}\right) \\
& - k_2M_R\left(\frac{B_E}{B_E + c_9}\right) - k_3M_R\left(\frac{B_E + wB_I + \beta F_\alpha}{B_E + wB_I + \beta F_\alpha + c_8}\right)\left(\frac{I_\gamma}{I_\gamma + f_1I_4 + f_7I_{10} + s_1}\right) - \mu_{M_R}M_R
\end{aligned}$$

Infected Macrophages ( $M_I$ ) become infected when a resting macrophage engulfs extracellular bacteria ( $B_E$ ).  $M_I$  can burst when  $B_I$  growth exceeds carrying capacity ( $N$ ) and can die through TNF- or cytotoxic T cell- mediated

apoptosis.

$$\begin{aligned} \frac{dM_I}{dt} = & k_2 M_R \left( \frac{B_E}{B_E + c_9} \right) - k_{17} M_I \left( \frac{B_I^2}{B_I^2 + N^2 M_I^2} \right) - k_{14a} M_I \left( \frac{\left( \frac{T_C + w_3 T_1}{M_I} \right)}{\left( \frac{T_C + w_3 T_1}{M_I} \right) + c_4} \right) \\ & - k_{14b} M_I \left( \frac{F_\alpha}{F_\alpha + f_9 I_{10} + s_{4b}} \right) - k_{52} M_I \left( \frac{\left( \frac{T_C \left( \frac{T_1}{T_1 + c_{T_1}} \right) + w_1 T_1}{M_I} \right)}{\left( \frac{T_C \left( \frac{T_1}{T_1 + c_{T_1}} \right) + w_1 T_1}{M_I} \right) + c_{52}} \right) - \mu_{M_I} M_I \end{aligned}$$

Activated Macrophages ( $M_A$ ) become activated through resting Macrophages ( $M_R$ ) interactions with extracellular bacteria ( $B_E$ ) and IFNgamma ( $I_\gamma$ ) in the granuloma.  $M_A$  can be de-activated by IL-10 ( $I_{10}$ ) cytokines or die.

$$\begin{aligned} \frac{dM_A}{dt} = & k_3 M_R \left( \frac{B_E + w B_I + \beta F_\alpha}{B_E + w B_I + \beta F_\alpha + c_8} \right) \left( \frac{I_\gamma}{I_\gamma + f_1 I_4 + f_7 I_{10} + s_1} \right) \\ & - k_4 M_A \left( \frac{I_{10}}{I_{10} + s_8} \right) - \mu_{M_A} M_A \end{aligned}$$

Primed CD4+ T cells ( $T_0$ ) can proliferate at the site of the granuloma based on numbers of activated macrophages. Additionally, they are recruited to the site according to  $M_I$ ,  $M_A$ ,  $F_\alpha$  concentrations in the granuloma. Differentiation of primed cells to effector states is based on cytokine concentrations across the granuloma. Primed cells can die.

$$\begin{aligned} \frac{dT_0}{dt} = & \alpha_{1a} (M_A + w_2 M_I) + S r_{1b} \left( \frac{F_\alpha}{F_\alpha + f_8 I_{10} + s_{4b2}} \right) + \alpha_2 T_0 \left( \frac{M_A}{M_A + c_{15}} \right) \\ & - k_6 I_{12} T_0 \left( \frac{I_\gamma}{I_\gamma + (f_1 I_4 + f_7 I_{10}) + s_1} \right) - k_7 T_0 \left( \frac{I_4}{I_4 + f_2 I_\gamma + s_2} \right) - \mu_{T_0} T_0 \end{aligned}$$

Effector Th1 T cells ( $T_1$ ) are recruited to the granuloma according to  $M_I$ ,  $M_A$ , and  $F_\alpha$ . They are a differentiated T cell state originating from primed

CD4+ T cells. They can die from too much IFNgamma ( $I_\gamma$ ).

$$\begin{aligned} \frac{dT_1}{dt} &= \alpha_{3a} (M_A + w_2 M_I) + Sr_{3b} \left( \frac{F_\alpha}{F_\alpha + f_8 I_{10} + s_{4b1}} \right) \\ &+ k_6 I_{12} T_0 \left( \frac{I_\gamma}{I_\gamma + (f_1 I_4 + f_7 I_{10}) + s_1} \right) - \mu_{T_\gamma} \left( \frac{I_\gamma}{I_\gamma + c} \right) T_1 M_A - \mu_{T_1} T_1 \end{aligned}$$

Effector Th2 T cells ( $T_2$ ) are recruited to the granuloma according to  $M_I$ ,  $M_A$ , and  $F_\alpha$ . They are a differentiated T cell state originating from primed CD4+ T cells.

$$\begin{aligned} \frac{dT_2}{dt} &= \alpha_{3a2} (M_A + w_2 M_I) + Sr_{3b2} \left( \frac{F_\alpha}{F_\alpha + f_8 I_{10} + s_{4b1}} \right) \\ &+ k_7 T_0 \left( \frac{I_4}{I_4 + f_2 I_\gamma + s_2} \right) - \mu_{T_2} T_2 \end{aligned}$$

Primed CD8+ T cells ( $T_{80}$ ) can proliferate at the site of the granuloma based on numbers of activated macrophages. Additionally, they are recruited to the site according to  $M_I$ ,  $M_A$ ,  $F_\alpha$  concentrations in the granuloma. Differentiation of primed cells to effector states is based on cytokine concentrations across the granuloma. Primed cells can die.

$$\begin{aligned} \frac{dT_{80}}{dt} &= \alpha_{1a} (M_A + w_2 M_I) + Sr_{1b} \left( \frac{F_\alpha}{F_\alpha + f_8 I_{10} + s_{4b2}} \right) \\ &+ \alpha_2 T_{80} \left( \frac{M_A}{M_A + c_{15}} \right) - k_6 I_{12} T_{80} \left( \frac{I_\gamma}{I_\gamma + (f_1 I_4 + f_7 I_{10}) + s_1} \right) - \mu_{T_0} T_{80} \end{aligned}$$

Effector CD8+ T cells ( $T_8$ ) are recruited to the granuloma according to  $M_I$ ,  $M_A$ , and  $F_\alpha$ . They are a differentiated T cell state originating from primed CD8+ T cells and can die from IFNgamma ( $I_\gamma$ ).

$$\begin{aligned} \frac{dT_8}{dt} &= m\alpha_{3ac} (M_A + w_2 M_I) + mSr_{3bc} \left( \frac{F_\alpha}{F_\alpha + f_8 I_{10} + s_{4b1}} \right) \\ &+ mk_6 I_{12} T_{80} \left( \frac{I_\gamma}{I_\gamma + (f_1 I_4 + f_7 I_{10}) + s_1} \right) - \mu_{T_{c\gamma}} \left( \frac{I_\gamma}{I_\gamma + c_c} \right) T_8 M_A - \mu_{T_c} T_8 \end{aligned}$$

Cytotoxic CD8+ T cells ( $T_C$ ) are recruited to the granuloma according to  $M_I$ ,  $M_A$ , and  $F_\alpha$ . They are a differentiated T cell state originating from primed CD8+ T cells and can die from IFNgamma ( $I_\gamma$ ).

$$\begin{aligned} \frac{dT_C}{dt} &= m\alpha_{3ac}(M_A + w_2M_I) + mSr_{3bc} \left( \frac{F_\alpha}{F_\alpha + f_8I_{10} + s_{4b1}} \right) \\ &+ mk_6I_{12}T_{80} \left( \frac{I_\gamma}{I_\gamma + (f_1I_4 + f_7I_{10}) + s_1} \right) - \mu_{T_C\gamma} \left( \frac{I_\gamma}{I_\gamma + c_c} \right) T_C M_A - \mu_{T_C} T_C \end{aligned}$$

TNF ( $F_\alpha$ ) is an inflammatory cytokine in the granuloma and is secreted by  $M_I$ ,  $M_A$ ,  $T_1$ ,  $T_C$  and  $T_8$  cells. It also decays in the granuloma.

$$\begin{aligned} \frac{dF_\alpha}{dt} &= \alpha_{30}M_I + \alpha_{31}M_A \left( \frac{I_\gamma + \beta_2(B_E + wB_I)}{I_\gamma + \beta_2(B_E + wB_I) + f_1I_4 + f_7I_{10} + s_{10}} \right) \\ &+ \alpha_{32}T_1 + \alpha_{33} \left( \frac{T_C + T_8}{2m} \right) - \mu_{F_\alpha} F_\alpha \end{aligned}$$

IFNgamma ( $I_\gamma$ ) is an inflammatory cytokine in the granuloma and is secreted by  $M_I$ ,  $M_A$ ,  $T_0$ ,  $T_1$ ,  $T_8$ ,  $T_C$  and  $T_8$  cells. It also decays in the granuloma.

$$\begin{aligned} \frac{dI_\gamma}{dt} &= s_g \left( \frac{B_E + wB_I}{B_E + wB_I + c_{10}} \right) \left( \frac{I_{12}}{I_{12} + s_7} \right) + \alpha_{5a}T_1 \left( \frac{M_A}{M_A + c_{5a}} \right) \\ &+ \alpha_{5b}T_8 \left( \frac{M_A}{M_A + c_{5b}} \right) + \alpha_{5c}M_I + \alpha_7T_0 \left( \frac{I_{12}}{I_{12} + f_4I_{10} + s_4} \right) \\ &+ \alpha_7T_{80} \left( \frac{I_{12}}{I_{12} + f_4I_{10} + s_4} \right) - \mu_{I_\gamma} I_\gamma \end{aligned}$$

IL-12 ( $I_{12}$ ) is secreted by  $M_R$  and  $M_A$  cells before decaying in the granuloma.

$$\begin{aligned} \frac{dI_{12}}{dt} &= s_{12} \left( \frac{B_E + wB_I}{B_E + wB_I + c_{230}} \right) + \alpha_{23}M_R \left( \frac{B_E + wB_I}{B_E + wB_I + c_{23}} \right) \\ &+ \alpha_8M_A \left( \frac{s}{s + I_{10}} \right) - \mu_{I_{12}} I_{12} \end{aligned}$$

IL-10 ( $I_{10}$ ) is secreted by  $M_I$ ,  $M_A$ ,  $T_1$ ,  $T_2$ ,  $T_C$  and  $T_8$  before decaying in the granuloma.

$$\begin{aligned} \frac{dI_{10}}{dt} = & \delta_7 (M_I + M_A) \left( \frac{s_6}{I_{10} + f_6 I_\gamma + s_6} \right) + \alpha_{16} T_1 + \alpha_{17} T_2 \\ & + \alpha_{18} \left( \frac{T_C + T_8}{2m} \right) - \mu_{I_{10}} I_{10} \end{aligned}$$

IL-4 ( $I_4$ ) is secreted by  $T_0$  and  $T_2$  before decaying in the granuloma.

$$\frac{dI_4}{dt} = \alpha_{11} T_0 + \alpha_{12} T_2 - \mu_{I_4} I_4$$

### 3 Example 3 Equations: transmission model of infectious disease

The model used for this example was initially shown in Menzies et al.<sup>35</sup>. More information can be found in their original paper, but briefly, the model includes 6 states including non-susceptible individuals ( $N$ ), susceptible individuals ( $S$ ), early disease cases ( $E$ ), late disease cases ( $L$ ) treatment cases ( $T$ ) and dead individuals ( $D$ ). The number of individuals by state and year ( $t$ ) is given by  $N_t$ ,  $S_t$ ,  $E_t$ ,  $L_t$  and  $T_t$ , respectively. Individuals enter the model as either non-susceptible or susceptible states, and transition between states to allow for infection ( $S$  to  $E$ ) disease progression ( $E$  to  $L$ ), treatment initiation ( $E$  and  $L$  to  $T$ ), and death (all other states to  $D$ ) via background and disease-specific mortality.  $\mu$  parameters are death rates,  $\lambda_t$  is the force of infection based on contact rate, and  $a$  represents annual birth rate.

$$\begin{aligned} \frac{dN}{dt} &= ab - \mu^B N \\ \frac{dS}{dt} &= a(1-b) - \mu^B S - \lambda_t S \\ \frac{dE}{dt} &= \lambda_t S - (\mu^B + \mu^E) E - r_t^E E - cE \\ \frac{dL}{dt} &= cE - (\mu^B + \mu^L) L - r^L L \\ \frac{dT}{dt} &= r_t^E E + r^L L - (\mu^B + \mu^T) T \\ \frac{dD}{dt} &= \mu^B (N + S + E + L + T + \mu^E E + \mu^L L + \mu^T T) \end{aligned}$$

## 4 Example 4 Model: agent-based model of granuloma formation

*GranSim* is an agent-based model of granuloma formation during *Mycobacterium tuberculosis* infection that has been curated for approximately 15 years within our lab. For this model example, we execute a 2D version of *GranSim* representing 4mm by 4mm section of lung tissue that tracks molecular, cellular, and tissue-scale events. We host a website (<http://malthus.micro.med.umich.edu/GranSim>) devoted to *GranSim*'s development and rules. Interested readers can download model parameter sets and a model executable as well.
